# Supplementary material
Source: HighWire-hosted journal article supplement (https://bmjopenquality.bmj.com/highwire/filestream/135898/field_highwire_adjunct_files/1/userfiles-Figure_2.docx)
Supplement: userfiles-Figure_2.docx [file userfiles-Figure_2.docx]

Fig. Percentage of accurate PD prescriptions in the second cycle.
